# Supplementary material for: Calculating Liquid-Phase Entropy using Real Gas Model within QM/PCM Framework
Source: Royal Society of Chemistry journal article supplement (doi:10.1039/d5cp04455c), 2026-01-01
Supplement: d5cp04455c2.xlsx [file d5cp04455c2.xlsx]

## Sheet: pure liquid
		Inputs
		outputs
		constants
constants
the Planck constant	h	6.62607e-34	m^2 kg / s
the Boltzman constant	kb	1.38065e-23	m^2 kg / (s^2 K)
the universal gas constant	R	8.31446	m^2 kg / (s^2 K mol)
pi	π	3.14159
the Avogadro number	NA	6.02214e+23	mol^-1
temperature	T		K
molar mass	m		g/mol
liquid density	r		g / cm3
Volume of a molecule	v_mol		A^3
liquid volume per 1 mol	V_liquid	#DIV/0!	m^3 / mol
liquid volume per molecule	v_liquid	#DIV/0!	m^3 / molecule
free volume	V_free	#DIV/0!	m^3 / mol
Translational partition function	q_trans	#DIV/0!	-
Translational energy	E_trans	0	kJ / mol
Translational entropy	S_trans	#DIV/0!	J / (mol K)
excluded volume	b	#DIV/0!	m^3 / mol

## Sheet: solute in solvent
		Inputs
		outputs
		constants
constants
the Planck constant	h	6.62607e-34	m^2 kg / s
the Boltzman constant	kb	1.38065e-23	m^2 kg / (s^2 K)
the universal gas constant	R	8.31446	m^2 kg / (s^2 K mol)
Pi	π	3.14159
the Avogadro number	NA	6.02214e+23	mol^-1
temperature	T		K
molar mass of solute	m_solute		g/mol
molar mass of solvent	m_solvent		g/mol
solvent density	r_solvent		g/cm3
Volume of a molecule	v_solute		A^3
Volume of a solvent molecule	v_solvent		A^3
excluded volume of solvent	b_sol	#DIV/0!	A^3
mole of solvent	n_solvent	#DIV/0!	mol/L
free volume	V_free	#DIV/0!	m^3 / mol
Translational partition function	q_trans	#DIV/0!	-
Translational energy	E_trans	0	kJ / mol
Translational entropy	S_trans	#DIV/0!	J / (mol K)

## Sheet: example1 methanol
		Inputs
		outputs
		constants
constants
the Planck constant	h	6.62607e-34	m^2 kg / s
the Boltzman constant	kb	1.38065e-23	m^2 kg / (s^2 K)
the universal gas constant	R	8.31446	m^2 kg / (s^2 K mol)
pi	π	3.14159
the Avogadro number	NA	6.02214e+23	mol^-1
temperature	T	298.15	K
molar mass	m	32.0262	g/mol
liquid density	r	0.7909	g / cm3
Volume of a molecule	v_mol	52.377	A^3
liquid volume per 1 mol	V_liquid	0.0404934	m^3 / mol
liquid volume per molecule	v_liquid	6.72408e-26	m^3 / molecule
free volume	V_free	2.06536e-08	m^3 / mol
Translational partition function	q_trans	3.62166e+24	-
Translational energy	E_trans	3.71843	kJ / mol
Translational entropy	S_trans	35.7029	J / (mol K)
excluded volume	b	3.7258e-05	m^3 / mol

## Sheet: example2 dioxane in cyclohexane
		Inputs
		outputs
		constants
constants
the Planck constant	h	6.62607e-34	m^2 kg / s
the Boltzman constant	kb	1.38065e-23	m^2 kg / (s^2 K)
the universal gas constant	R	8.31446	m^2 kg / (s^2 K mol)
Pi	π	3.14159
the Avogadro number	NA	6.02214e+23	mol^-1
temperature	T	298.15	K
molar mass of solute	m_solute	88.0524	g/mol
molar mass of solvent	m_solvent	84.0939	g/mol
solvent density	r_solvent	0.7786	g/cm3
Volume of a molecule	v_solute	113.853	A^3
Volume of a solvent molecule	v_solvent	134.976	A^3
excluded volume of solvent	b_sol	9.82432e-05	A^3
mole of solvent	n_solvent	8.41519	mol/L
free volume	V_free	3.25486e-06	m^3 / mol
Translational partition function	q_trans	2.60194e+27	-
Translational energy	E_trans	3.71843	kJ / mol
Translational entropy	S_trans	90.3878	J / (mol K)
